# Supplementary material
Source: Springer Nature journal article supplement (https://www.springermedizin.de/resource/supplementary/12888_2010_1851_MOESM1_ESM.pdf/9478224)
Supplement: MOESM1 [file 9478224]

Subjects with any primary diagnosis of schizophrenia, schizoaffective disorders, bipolar affective disorder, substance use disorders, depressive episode, or recurrent depressive disorder (N = 38,066 with 1,979 deaths)

Active subjects with any of the above diagnoses during 2007 – 2009 (N = 32,164)

Age < 15 years old on 1 Jul, 2008 or missing date of birth (n = 445)

Male: 17,113; Female: 14,579  
(N = 31,719 with 1,370 deaths)

Schizophrenia  
(n = 7,022 with 322 deaths)

Schizoaffective disorders  
(n = 1,313 with 44 deaths)

Bipolar affective disorder  
(n = 2,700 with 108 deaths)

Substance use disorders  
(n = 10,927 with 348 deaths)

Depressive episode, or recurrent depressive disorder  
(n = 11,697 with 620 deaths)
